# Supplementary material for: Ultrafiltration and Nanofiltration for the Removal of Pharmaceutically Active Compounds from Water: The Effect of Operating Pressure on Electrostatic Solute—Membrane Interactions
Source: MDPI journal article supplement (doi:10.3390/membranes13080743), 2023-08-19
Supplement: s1 [file s1]

## Supplementary Material

### Ultrafiltration and Nanofiltration for the Removal of Pharmaceutically Active Compounds from Water: The Effect of Operating Pressure on Electrostatic Solute-Membrane Interactions

Alexandre Giacobbo<sup>1,2,\*</sup>, Isabella Franco Pasqualotto<sup>1</sup>, Rafael Cabeleira de Coronel Machado Filho<sup>1</sup>, Miguel Minhalma<sup>2,3</sup>, Andréa Moura Bernardes<sup>1</sup>, Maria Norberta de Pinho<sup>2,4\*</sup>

<sup>1</sup> Post-Graduation Program in Mining, Metallurgical and Materials Engineering (PPGE3M), Federal University of Rio Grande do Sul (UFRGS), Av. Bento Gonçalves n. 9500, CEP: 91.509-900 Porto Alegre, Brazil. E-mail: alexandre\_giacobbo@yahoo.com.br

<sup>2</sup> Centre of Physics and Engineering of Advanced Materials (CeFEMA), Instituto Superior Técnico, University of Lisbon, Av. Rovisco Pais, n. 1, 1049-001 Lisbon, Portugal

<sup>3</sup> Chemical Engineering Department, Instituto Superior de Engenharia de Lisboa, Instituto Politécnico de Lisboa, Rua Conselheiro Emídio Navarro, 1, 1959-007 Lisboa, Portugal

<sup>4</sup> Chemical Engineering Department, Instituto Superior Técnico, University of Lisbon, Av. Rovisco Pais, n. 1, 1049-001 Lisbon, Portugal

\* Author to whom correspondence should be addressed

Supplementary Material includes 5 figures and 2 tables.

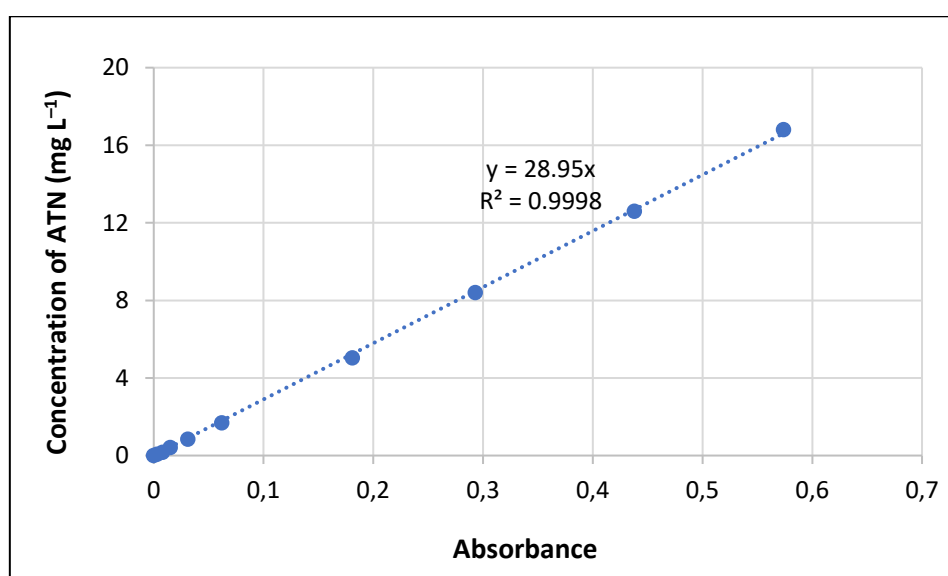

**Figure S1.** Calibration curve for determination of atenolol (ATN) by spectrophotometric method. ATN concentration versus absorbance at 226 nm (wavelength of maximum absorption).

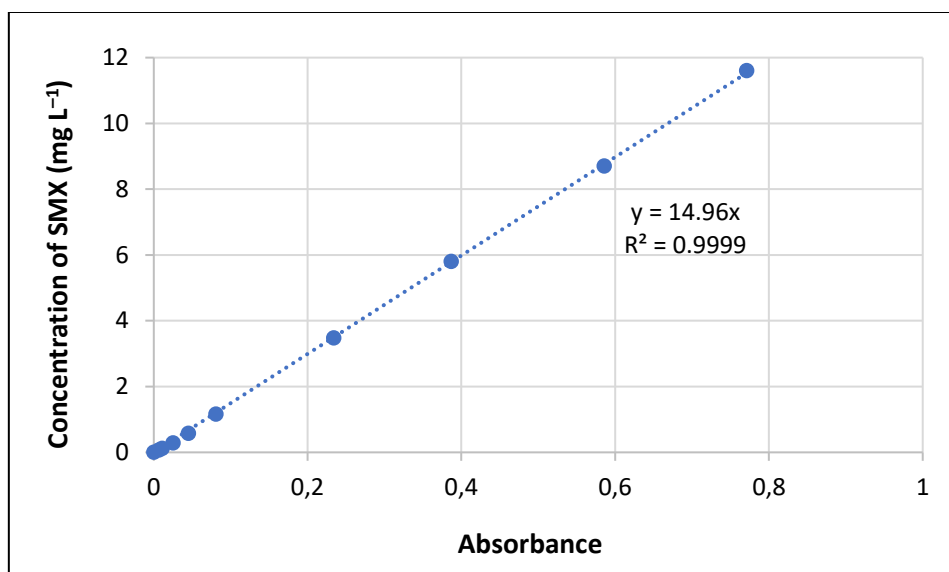

**Figure S2.** Calibration curve for determination of sulfamethoxazole (SMX) by spectrophotometric method. SMX concentration versus absorbance at 265 nm (wavelength of maximum absorption).

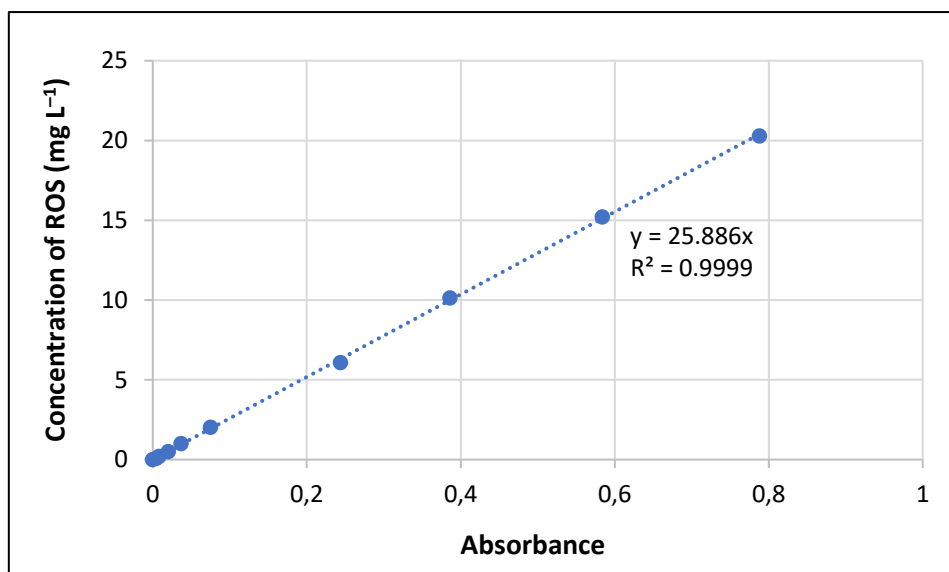

**Figure S3.** Calibration curve for determination of rosuvastatin (ROS) by spectrophotometric method. ROS concentration versus absorbance at 242 nm (wavelength of maximum absorption).

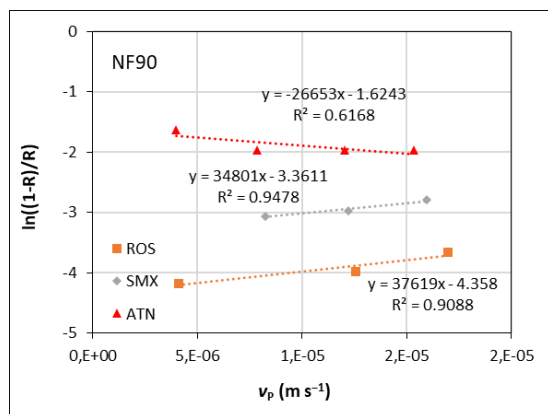

(a)

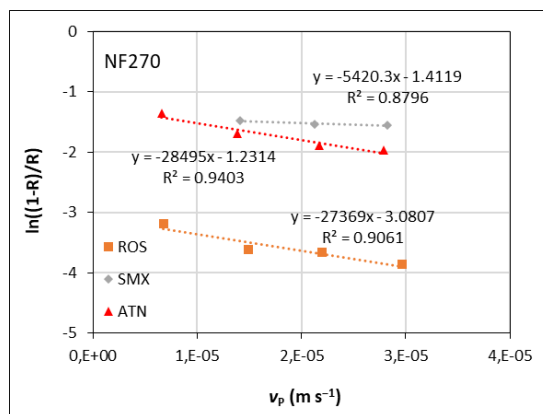

(b)

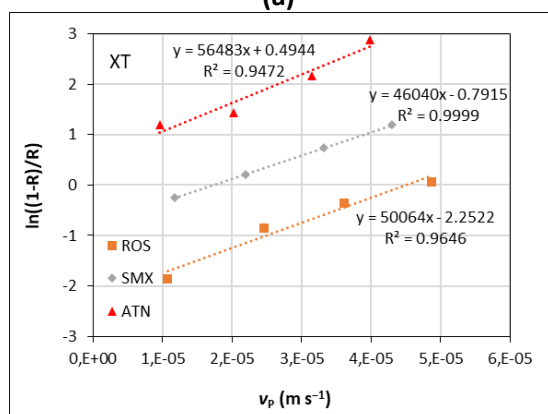

(c)

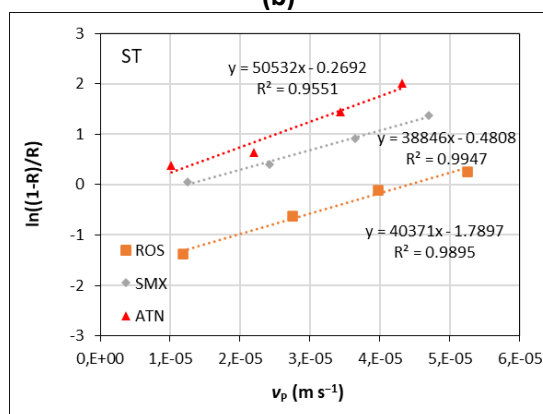

(d)

**Figure S4.** Variation of  $\ln((1-R)/R)$  with the permeation velocity ( $v_p$ ) of PhACs solutions for membranes: a) NF90; b) NF270; c) XT; and d) ST.

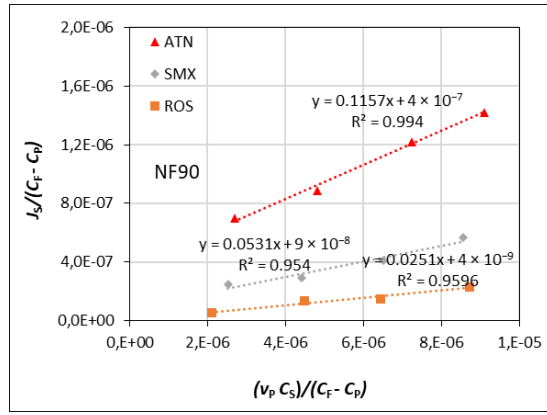

(a)

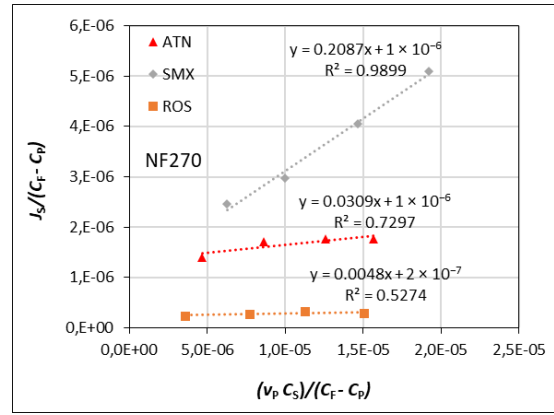

(b)

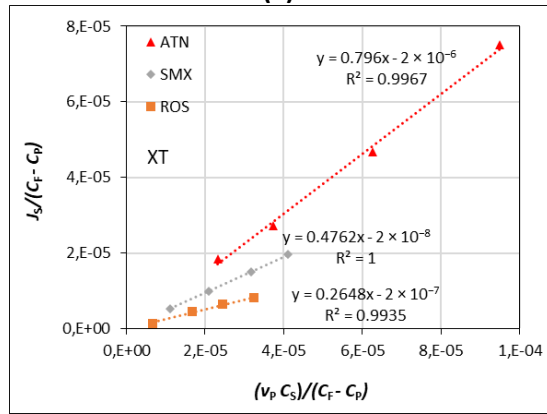

(c)

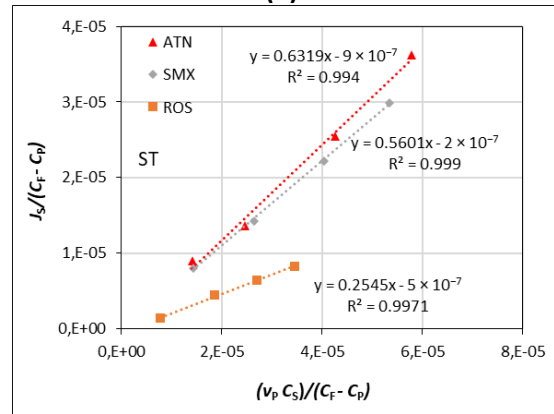

(d)

**Figure S5.** Variation of  $J_S/(C_F - C_P)$  with  $(v_P C_S)/(C_F - C_P)$  of PhACs solutions for membranes: a) NF90; b) NF270; c) XT; and d) ST. SKK model.

**Table S1.** Mean concentration of PhACs (ATN, SMX and ROS) in the bulk feed solution ( $C_F$ ), in the permeate ( $C_P$ ), at the boundary layer adjacent to the membrane surface ( $C_M$ ) determined by Film Theory, as well as the concentration polarization module assessed in the different operating pressures.

| PhAC | $\Delta P$ | $C_F$ | NF90                  |                       |                                   | NF270                 |                       |                                   | XT                    |                       |                                   | ST                    |                       |                                   |
|------|------------|-------|-----------------------|-----------------------|-----------------------------------|-----------------------|-----------------------|-----------------------------------|-----------------------|-----------------------|-----------------------------------|-----------------------|-----------------------|-----------------------------------|
|      |            |       | $C_M$                 | $C_P$                 | $\frac{(C_M - C_P)}{(C_F - C_P)}$ | $C_M$                 | $C_P$                 | $\frac{(C_M - C_P)}{(C_F - C_P)}$ | $C_M$                 | $C_P$                 | $\frac{(C_M - C_P)}{(C_F - C_P)}$ | $C_M$                 | $C_P$                 | $\frac{(C_M - C_P)}{(C_F - C_P)}$ |
|      |            |       | (mg L <sup>-1</sup> ) | (mg L <sup>-1</sup> ) | ( $C_F - C_P$ )                   | (mg L <sup>-1</sup> ) | (mg L <sup>-1</sup> ) | ( $C_F - C_P$ )                   | (mg L <sup>-1</sup> ) | (mg L <sup>-1</sup> ) | ( $C_F - C_P$ )                   | (mg L <sup>-1</sup> ) | (mg L <sup>-1</sup> ) | ( $C_F - C_P$ )                   |
| ATN  | 2          | 3.55  | 3.88                  | 0.58                  | 0.54                              | 4.13                  | 0.72                  | 0.70                              | 4.15                  | 2.72                  | 1.09                              | 4.52                  | 2.12                  | 1.43                              |
|      | 4          | 3.55  | 4.28                  | 0.43                  | 0.47                              | 5.01                  | 0.55                  | 0.69                              | 5.00                  | 2.87                  | 1.72                              | 6.07                  | 2.32                  | 2.45                              |
|      | 6          | 3.55  | 4.73                  | 0.43                  | 0.53                              | 6.19                  | 0.46                  | 0.75                              | 5.34                  | 3.19                  | 1.93                              | 6.73                  | 2.87                  | 3.12                              |
|      | 8          | 3.55  | 5.12                  | 0.43                  | 0.57                              | 7.33                  | 0.43                  | 0.84                              | 5.14                  | 3.36                  | 1.69                              | 6.86                  | 3.13                  | 3.29                              |
| SMX  | 2          | 3.94  | 4.58                  | 0.24                  | 0.26                              | 4.06                  | 0.99                  | 0.77                              | 5.52                  | 1.73                  | 1.66                              | 5.15                  | 2.01                  | 1.60                              |
|      | 4          | 3.94  | 5.19                  | 0.18                  | 0.23                              | 4.19                  | 0.73                  | 0.64                              | 7.02                  | 2.18                  | 2.68                              | 6.40                  | 2.37                  | 2.43                              |
|      | 6          | 3.94  | 5.93                  | 0.19                  | 0.28                              | 4.34                  | 0.69                  | 0.64                              | 8.56                  | 2.66                  | 3.99                              | 7.45                  | 2.82                  | 3.31                              |
|      | 8          | 3.94  | 6.70                  | 0.23                  | 0.38                              | 4.48                  | 0.69                  | 0.66                              | 9.67                  | 3.03                  | 5.11                              | 8.08                  | 3.14                  | 3.94                              |
| ROS  | 2          | 4.99  | 5.81                  | 0.08                  | 0.09                              | 5.96                  | 0.20                  | 0.23                              | 5.96                  | 0.68                  | 0.72                              | 7.42                  | 1.01                  | 1.30                              |
|      | 4          | 4.99  | 6.88                  | 0.10                  | 0.14                              | 7.45                  | 0.13                  | 0.19                              | 9.73                  | 1.50                  | 2.47                              | 11.60                 | 1.74                  | 3.44                              |
|      | 6          | 4.99  | 7.96                  | 0.09                  | 0.15                              | 9.01                  | 0.13                  | 0.22                              | 13.58                 | 2.05                  | 4.74                              | 15.50                 | 2.35                  | 6.19                              |
|      | 8          | 4.99  | 9.34                  | 0.13                  | 0.23                              | 11.09                 | 0.10                  | 0.23                              | 17.84                 | 2.57                  | 7.87                              | 20.91                 | 2.82                  | 10.22                             |

**Table S2.** Values of experimental (apparent), intrinsic, and calculated rejections by SD and SKK models for ATN, SMX, and ROS at pressures from 2 to 8 bar.

| PhAC | $\Delta P$<br>(bar) | NF90    |          |                 |                  | NF270   |          |                 |                  | XT      |          |                 |                  | ST      |          |                 |                  |
|------|---------------------|---------|----------|-----------------|------------------|---------|----------|-----------------|------------------|---------|----------|-----------------|------------------|---------|----------|-----------------|------------------|
|      |                     | Exp.    | Film     | SD              | SKK              |
|      |                     | $R$ (%) | $R'$ (%) | $R_{SD}$<br>(%) | $R_{SKK}$<br>(%) | $R$ (%) | $R'$ (%) | $R_{SD}$<br>(%) | $R_{SKK}$<br>(%) | $R$ (%) | $R'$ (%) | $R_{SD}$<br>(%) | $R_{SKK}$<br>(%) | $R$ (%) | $R'$ (%) | $R_{SD}$<br>(%) | $R_{SKK}$<br>(%) |
| ATN  | 2                   | 83.67   | 83.54    | 81.66           | 83.95            | 79.59   | 77.41    | 71.97           | 85.24            | 23.27   | 37.89    | 34.28           | 20.05            | 40.41   | 56.69    | 48.32           | 36.79            |
|      | 4                   | 87.76   |          | 78.68           | 87.27            | 84.49   |          | 63.37           | 91.63            | 19.18   |          | 1.60            | 20.39            | 34.69   |          | 19.35           | 36.81            |
|      | 6                   | 87.76   |          | 76.17           | 88.11            | 86.94   |          | 52.92           | 93.87            | 10.20   |          | 0.86            | 20.40            | 19.18   |          | 17.00           | 36.81            |
|      | 8                   | 87.76   |          | 73.98           | 88.31            | 87.76   |          | 43.33           | 94.77            | 5.31    |          | 17.73           | 20.40            | 11.84   |          | 19.83           | 36.81            |
| SMX  | 2                   | 94.01   | 96.65    | 96.18           | 94.32            | 74.91   | 80.41    | 80.98           | 75.13            | 56.18   | 68.82    | 56.35           | 52.38            | 48.88   | 61.79    | 50.84           | 43.99            |
|      | 4                   | 95.51   |          | 95.58           | 94.65            | 81.46   |          | 78.57           | 78.22            | 44.57   |          | 44.35           | 52.38            | 39.89   |          | 36.67           | 43.99            |
|      | 6                   | 95.13   |          | 94.95           | 94.69            | 82.40   |          | 77.47           | 78.93            | 32.40   |          | 32.15           | 52.38            | 28.46   |          | 27.34           | 43.99            |
|      | 8                   | 94.19   |          | 94.30           | 94.69            | 82.58   |          | 76.55           | 79.08            | 23.22   |          | 23.52           | 52.38            | 20.22   |          | 22.49           | 43.99            |
| ROS  | 2                   | 98.48   | 98.74    | 98.53           | 97.49            | 96.06   | 95.61    | 96.69           | 96.88            | 86.45   | 90.48    | 88.87           | 73.52            | 79.72   | 85.69    | 78.55           | 74.50            |
|      | 4                   | 97.94   |          | 98.26           | 97.49            | 97.38   |          | 93.27           | 98.42            | 69.96   |          | 82.66           | 73.52            | 65.08   |          | 67.02           | 74.55            |
|      | 6                   | 98.15   |          | 97.98           | 97.49            | 97.49   |          | 91.82           | 98.84            | 58.88   |          | 75.70           | 73.52            | 52.91   |          | 55.99           | 74.55            |
|      | 8                   | 97.49   |          | 97.64           | 97.49            | 97.94   |          | 89.88           | 99.06            | 48.45   |          | 67.83           | 73.52            | 43.47   |          | 39.47           | 74.55            |
